# Supplementary material for: The nucleoporin Nup50 activates the Ran guanine nucleotide exchange factor RCC1 to promote NPC assembly at the end of mitosis
Source: PubMed Central journal article supplement — EMBO J. 2021 Nov 2;40(23):e108788. doi: 10.15252/embj.2021108788 (PMC8634129; doi:10.15252/embj.2021108788), 2021-11-02

**The nucleoporin Nup50 activates the Ran guanyl-nucleotide exchange factor RCC1 to promote NPC assembly at the end of mitosis – APPENDIX FIGURES**

Guillaume Holzer (1), Paola de Magistris (1,2,5), Cathrin Gramminger (2), Ruchika Sachdev (2), Adriana Magalska (2), Allana Schooley (2), Anja, Scheufen (1), Birgitt Lennartz (1), Marianna Tatarek-Nossol (1), Hongqi Lue (1), Monika I. Linder (3, 6), Ulrike Kutay (3), Christian Preisinger (4), Daniel Moreno-Andres (1), Wolfram Antonin (1)

(1) Institute of Biochemistry and Molecular Cell Biology, Medical School, RWTH Aachen University, 52074 Aachen, Germany

(2) Friedrich Miescher Laboratory of the Max Planck Society, Spemannstraße 39, 72076 Tübingen, Germany

(3) Institute of Biochemistry, ETH Zurich, Otto-Stern-Weg 3, 8093 Zurich, Switzerland

(4) Proteomics Facility, Interdisciplinary Centre for Clinical Research (IZKF), Medical School, RWTH Aachen University, Aachen, Germany

(5) Current address: Kavli Institute of Nanoscience, Department of Bionanoscience, van der Maasweg 9, 2629HZ Delft, the Netherlands

(6) Current address Department of Pediatrics, Dr. von Hauner Children's Hospital and Gene Center, University Hospital, LMU, 80337 Munich, Germany

## **Table of content:**

|                                  |                     |
|----------------------------------|---------------------|
| <b>Appendix Figures legends:</b> | <b>pages 2 to 5</b> |
| <b>Appendix Figure S1</b>        | <b>page 6</b>       |
| <b>Appendix Figure S2</b>        | <b>page 7</b>       |
| <b>Appendix Figure S3</b>        | <b>page 8</b>       |
| <b>Appendix Figure S4</b>        | <b>page 9</b>       |
| <b>Appendix Figure S5</b>        | <b>page 10</b>      |
| <b>Appendix Figure S6</b>        | <b>page 11</b>      |
| <b>Appendix Figure S7</b>        | <b>page 12</b>      |

### **Appendix Figure S 1: Characterization of Nup50 antisera, recombinant protein and depletion phenotype**

(A) Western blot against *Xenopus* Nup50 on Mock treated (control, left lane) or Nup50 depleted (right lane) *Xenopus* egg extract.

(B) Confocal microscopy images of nuclei assembled for 120 min in mock depleted, Nup50 depleted ( $\Delta$ Nup50), and Nup50 depleted *Xenopus* egg extracts supplemented with recombinant Nup50. Then, 5  $\mu$ M recombinant EGFP-M9-M10 as import substrate or EGFP-M9-NES as export substrate [71] were added, the later in the absence or presence of 300 nM leptomycin. After 120 min, nuclei were fixed in 4 % PFA and 0.5 % glutaraldehyde, membranes were pre-labelled with DiIC18 (1,1'-Diocadecyl-3,3,3',3'-Tetramethylindocarbocyanine Perchlorate, red) and chromatin was stained with DAPI (4',6-Diamidin-2-phenylindol, blue).

(C) Coomassie gels showing recombinant Nup50 purifications. The respective proteins are marked with an arrow.

(D) Coomassie gels showing the input of the GST-pulldown experiment presented in Fig. 5D.

(E) Coomassie gels showing the input of the GST-pulldown experiment presented in Fig. 7E.

**Appendix Figure S2: Nup50 downregulation delays NPC assembly at the end of mitosis in living cells.** (A)

Live cell imaging of mitotic HeLa cells stably expressing EGFP-Nup107 showing the accumulation of EGFP-Nup107 signal on chromatin during mitotic exit. Chromatin is stained with SiR-DNA, time is normalized to the last metaphase frame. White arrows indicate when the EGFP-Nup107 signal appears on the chromatin surface during late mitosis, distinct from the kinetochore labeling. (B and C) Box and whiskers as well as cumulative frequency plots showing time of appearance of the first EGFP-Nup107 signal on the chromatin surface as in (A) for control (CTRL) (10 cells) and siNup50 (16 cells) treated cells from three independent experiments. (D) Quantitation of EGFP-Nup107 signal at the surface of the daughter chromatin masses 15 min after last metaphase. Truncated violin plots show the median (red line) and interquartile range (black lines). P-values were determined by two-tailed t-test. (E-H) Same analysis as in A-D in HeLa cells stably expressing EGFP-Nup133. Control (12 cells) and siNup50 (18 cells) from four independent experiments were used.

**Appendix Figure S3: Nup50 interacts with MEL28/ELYS**

(

(A) Western blot analysis of Mock treated, MEL28/ELYS depleted or Nup50 depleted Xenopus egg extracts with MEL28/ELYS and Nup50 antibodies. The importin  $\alpha$ -export factor CAS serves as loading control.

(B) Relative quantification of MEL28/ELYS and Nup50 proteins in depleted extract. Quantitation in mock treated extracts, MEL28/ELYS depleted extracts and Nup50 depleted extracts are respectively plotted from the left to the right. The white bar represents the amount of Nup50 protein and the grey bar represents the amount of MEL28/ELYS from n=4 independent experiments. Individual data points are indicated, data normalized to the mock condition.

**Appendix Figure S4: Time course of Nup50 and MEL28/ELYS chromatin recruitment**

(A, B) Demembranated sperm chromatin was preincubated in Xenopus egg extract for 10 min. At time point zero, membranes were added to the reaction. Reactions were stopped at the indicated time points by fixation and analyzed by confocal microscopy after immunofluorescence with  $\alpha$ -Nup50 (A),  $\alpha$ -

MEL28/ELYS (B), and mAb414 (A, B). Chromatin was stained with DAPI (left column in A and B). Scale bar: 10  $\mu$ m.

#### **Appendix Figure S5: Alignment of metazoan Nup50 144-189 with Nup2 from different yeast species**

Sequence alignment of Nup50 144-189 (*X. laevis* numbering) with Nup2/Nup61, species are indicated on the left. The color scheme indicates the type of amino acids according to the alignment software default setting.

#### **Appendix Figure S6: Localization of Nup50 mutants in in vitro nuclear assembly assays**

Confocal microscopy images of nuclei assembled for 120 min in Nup50 depleted *Xenopus* egg extracts supplemented with recombinant wild type Nup50 or different mutants. Nuclei were fixed in 4% PFA and 0.5 % glutaraldehyde, stained for NPCs (mAB414), Nup50 and the chromatin (DAPI). Scale bar: 10  $\mu$ m.

#### **Appendix Figure S7: Nup50 N-terminus interacts with RCC1**

(A) *Xenopus* egg extract were supplemented with 5  $\mu$ M RanQ69L, RCC1, Nup50 wild type and fragments as well indicated combinations of 5  $\mu$ M Nup50 and 5  $\mu$ M RCC1. After 90 min, annulate lamellae were isolated by centrifugation and quantified by western blotting with mAB414 antibody. Quantitation shows the relative Nup62 signal as a mean from at least three experiments, normalized to the buffer control. Individual data points are indicated.

(B) HEK293T cells were transfected with empty control vector, different FLAG-Nup50 N-terminal fragments aa 1-120 and aa 48-120 (of the human sequence, respectively corresponding to the 1-114 or 48-114 residues of the *Xenopus* sequence, amino acid exchanges are identical between *Xenopus* and human proteins) or different double mutants designed to compromise RCC1 binding. Please note that with the E32AE33A a third Nup50 mutant, which is not impaired in RCC1 binding, is included. 24h post transfection cells were lysed, FLAG-tagged proteins immunoprecipitated and analyzed by western blotting, with 10% of the inputs loaded.

(C) GST-fusion constructs of the *Xenopus* Nup50 N-terminal fragment (aa 1-114) comprising no or the two RCC1-binding mutations (G25A/F27A and K36A/R38A) were incubated with *Xenopus* egg extracts. Starting material (input) as well as bound proteins were analyzed by Western blotting with indicated antibodies. The quantitation shows the average bead bound signal from three independent experiments, normalized to the input. Data points from individual experiments are indicated. GST-Nup53 (aa 162-267) served as a control for unspecific binding (control).

(D) Coomassie gels showing recombinant proteins employed in the GEF assay (Fig 8E). The respective proteins are marked with an arrow.

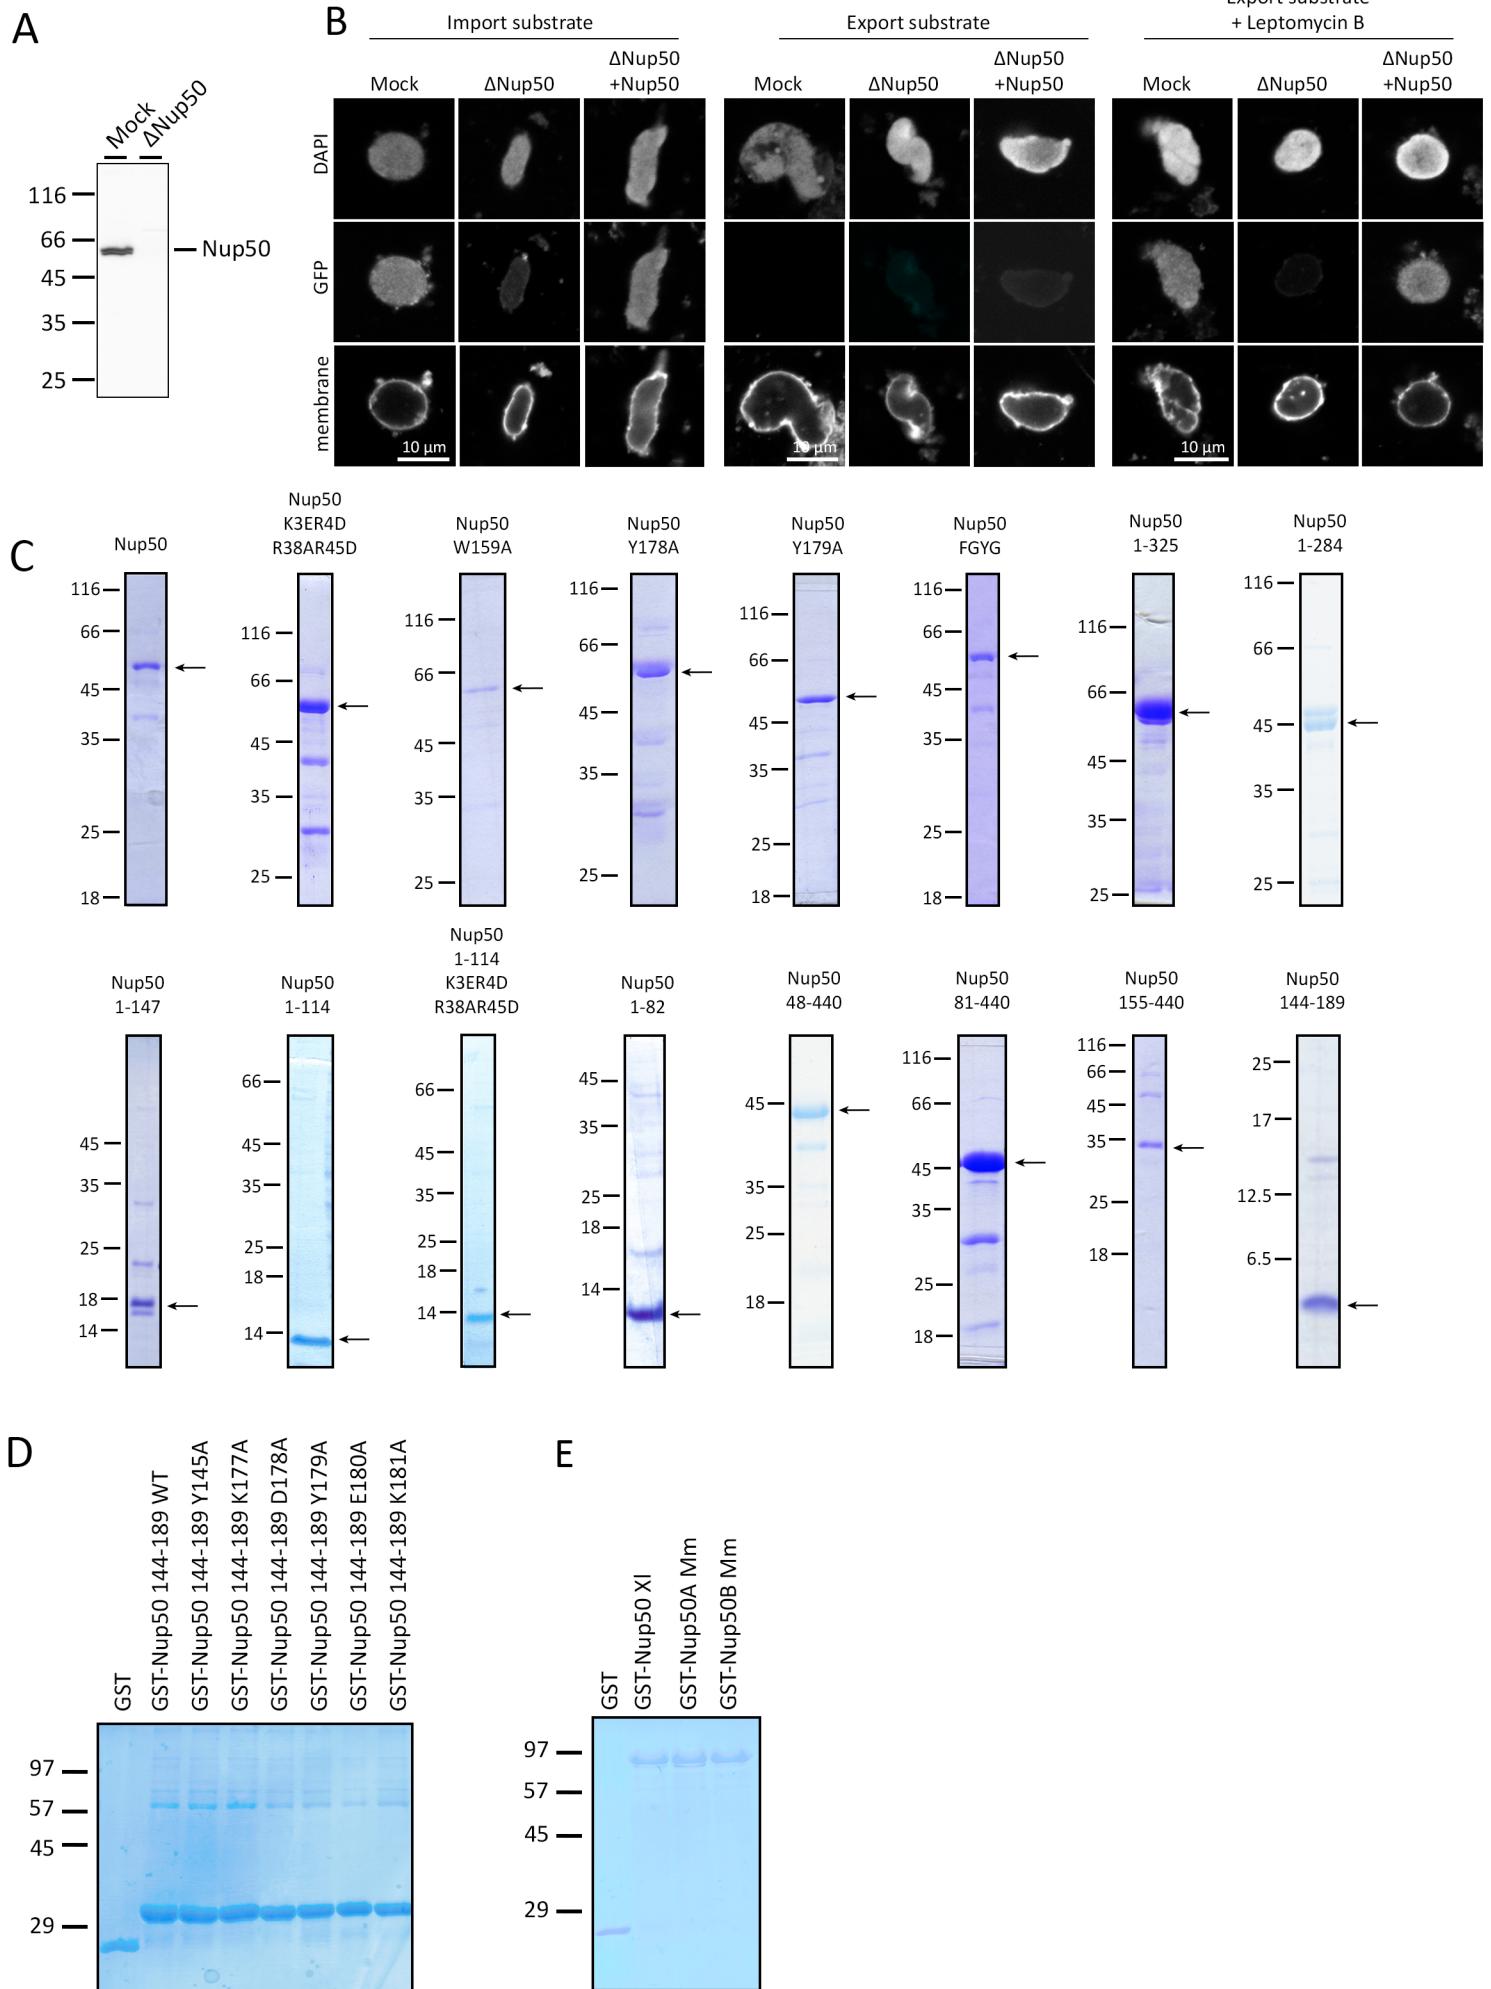

**A**

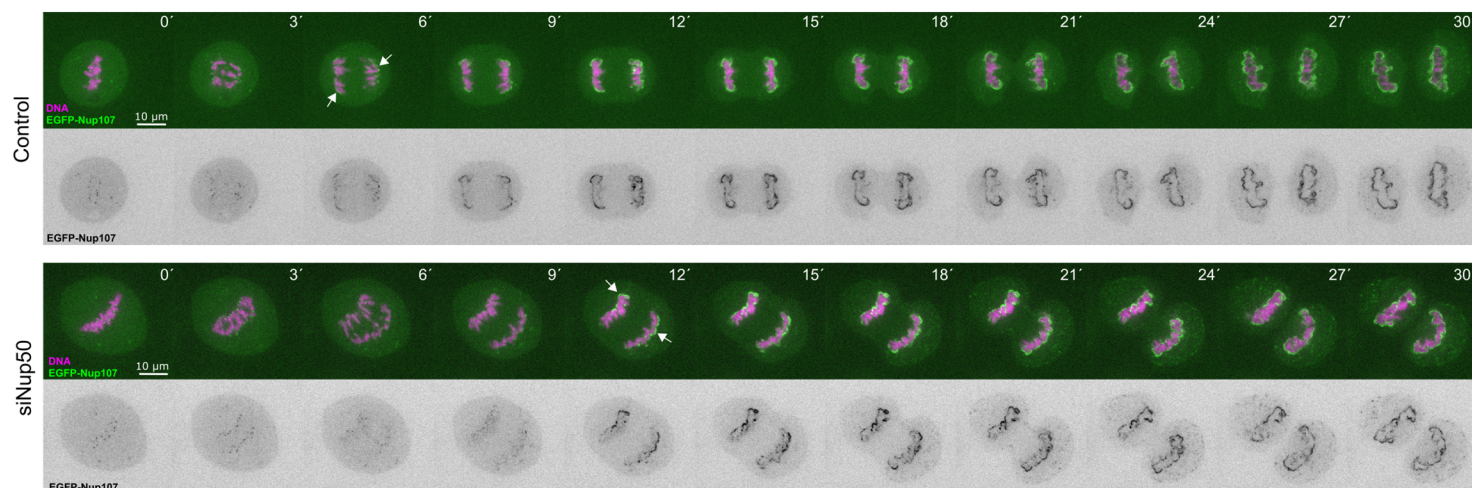

**B**

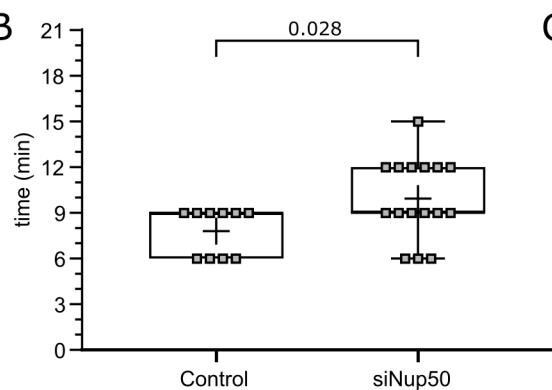

**C**

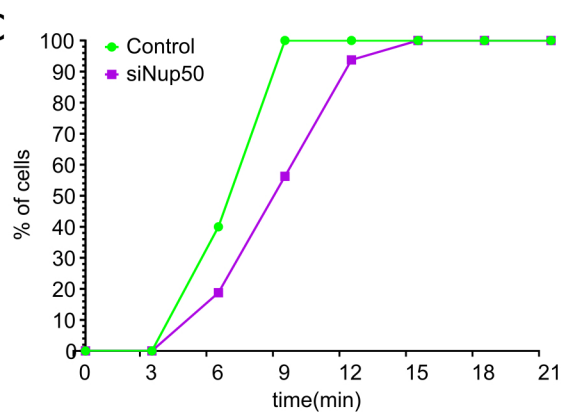

**D**

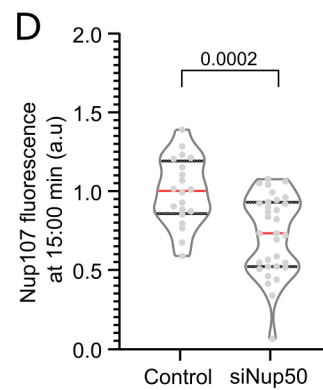

**E**

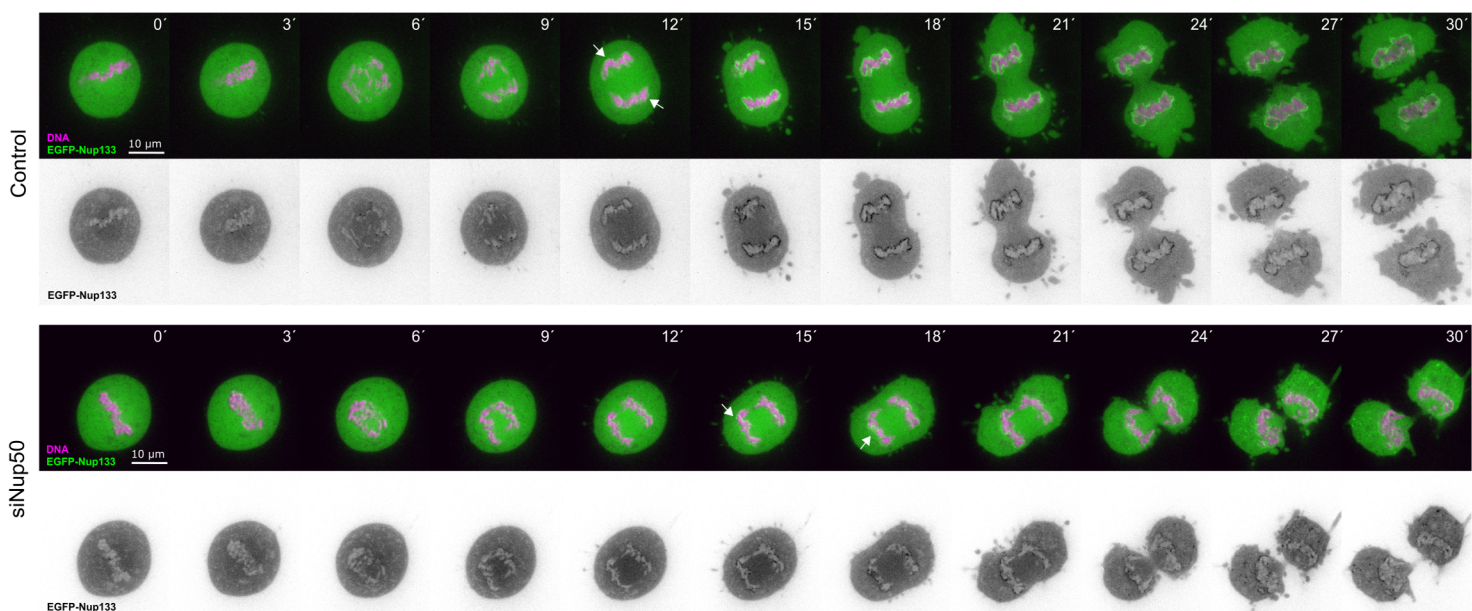

**F**

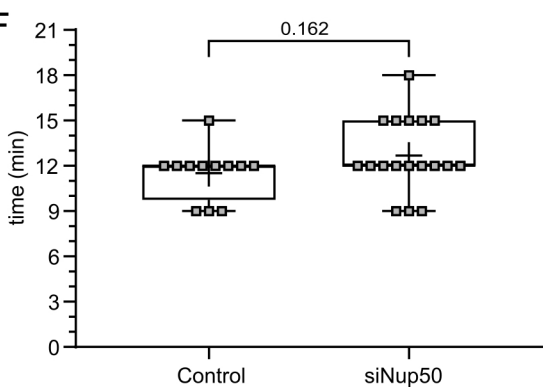

**G**

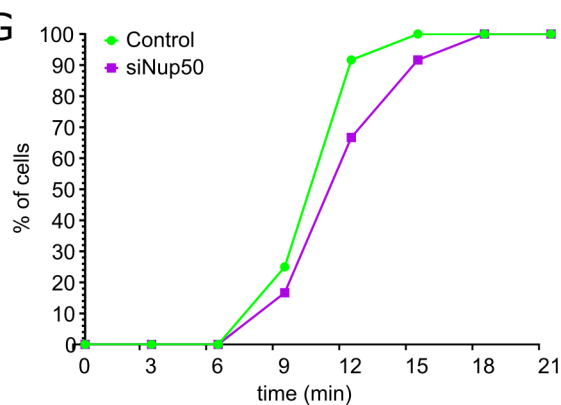

**H**

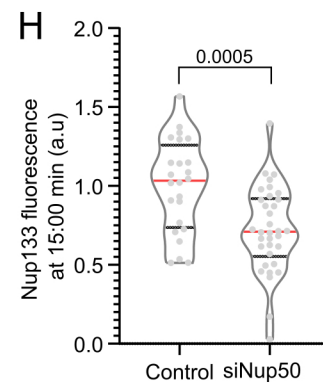

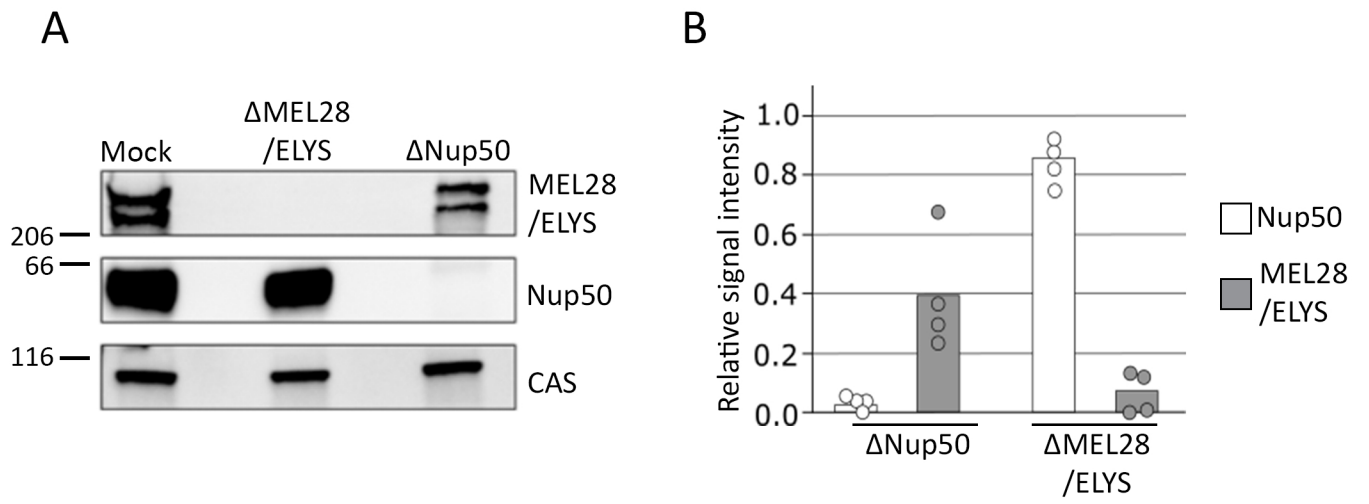

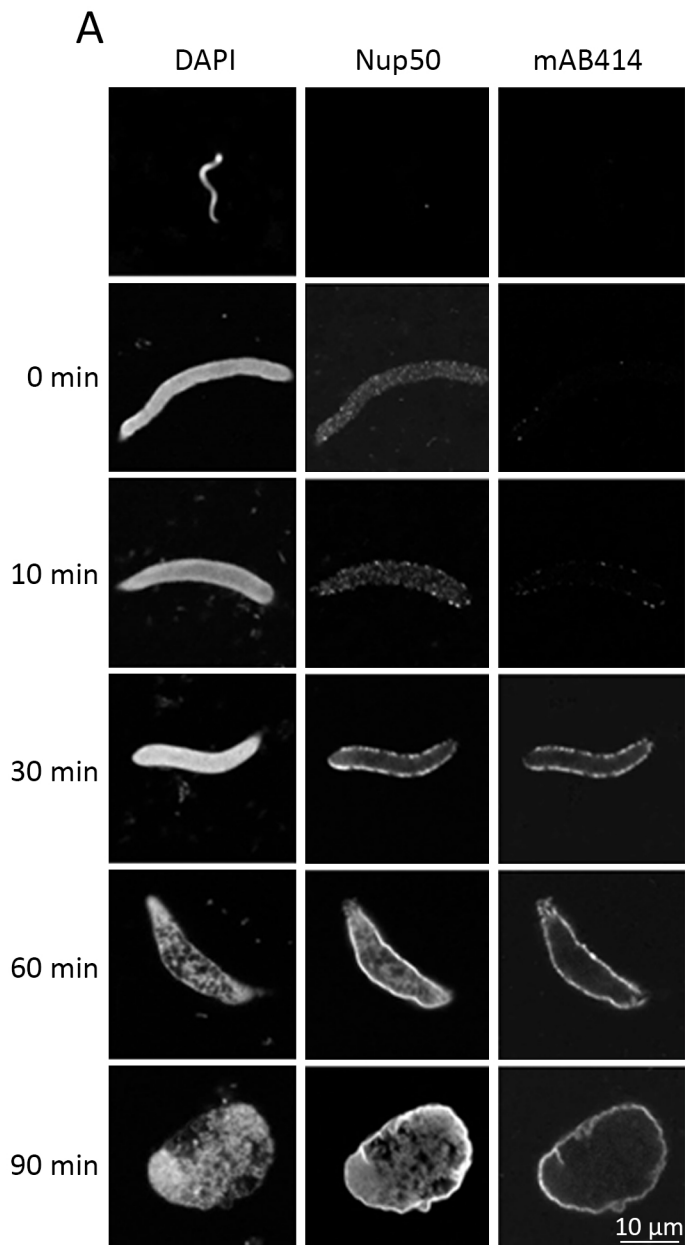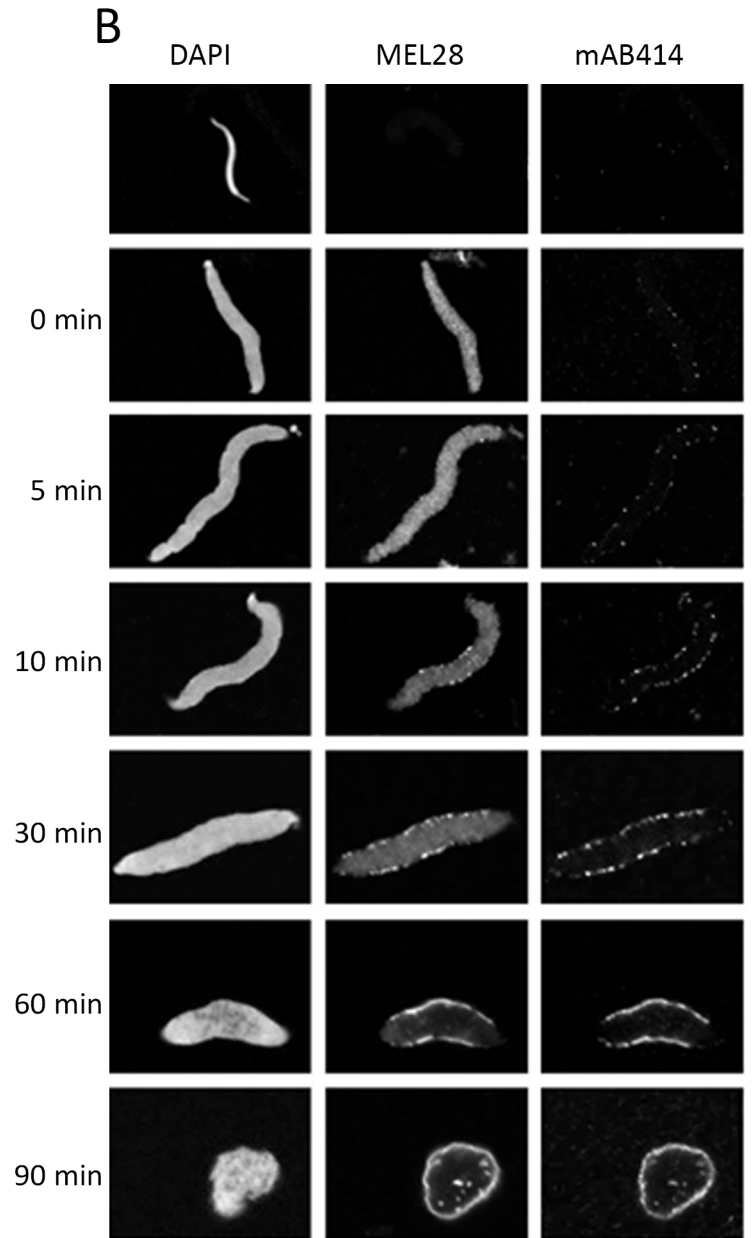

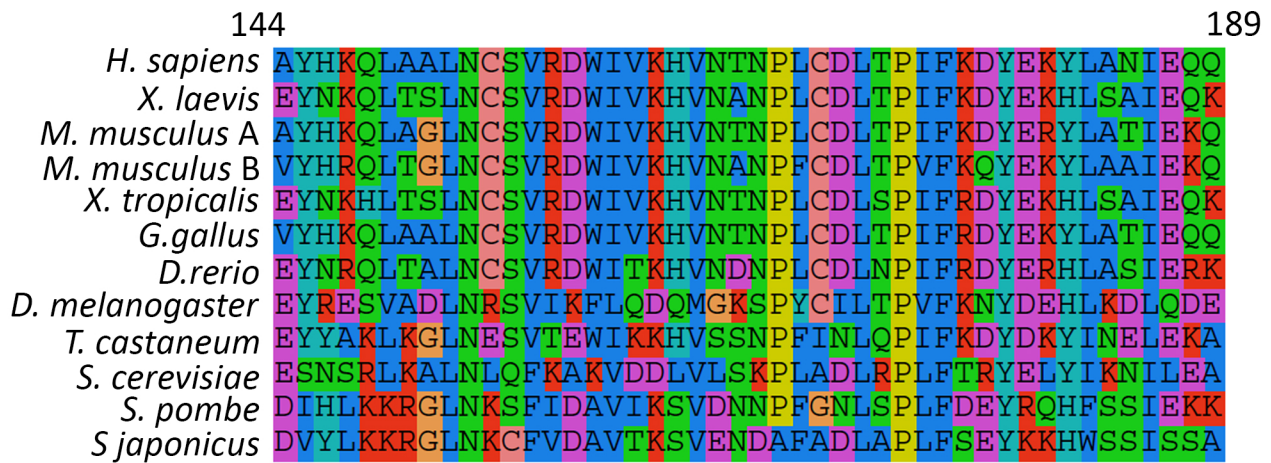

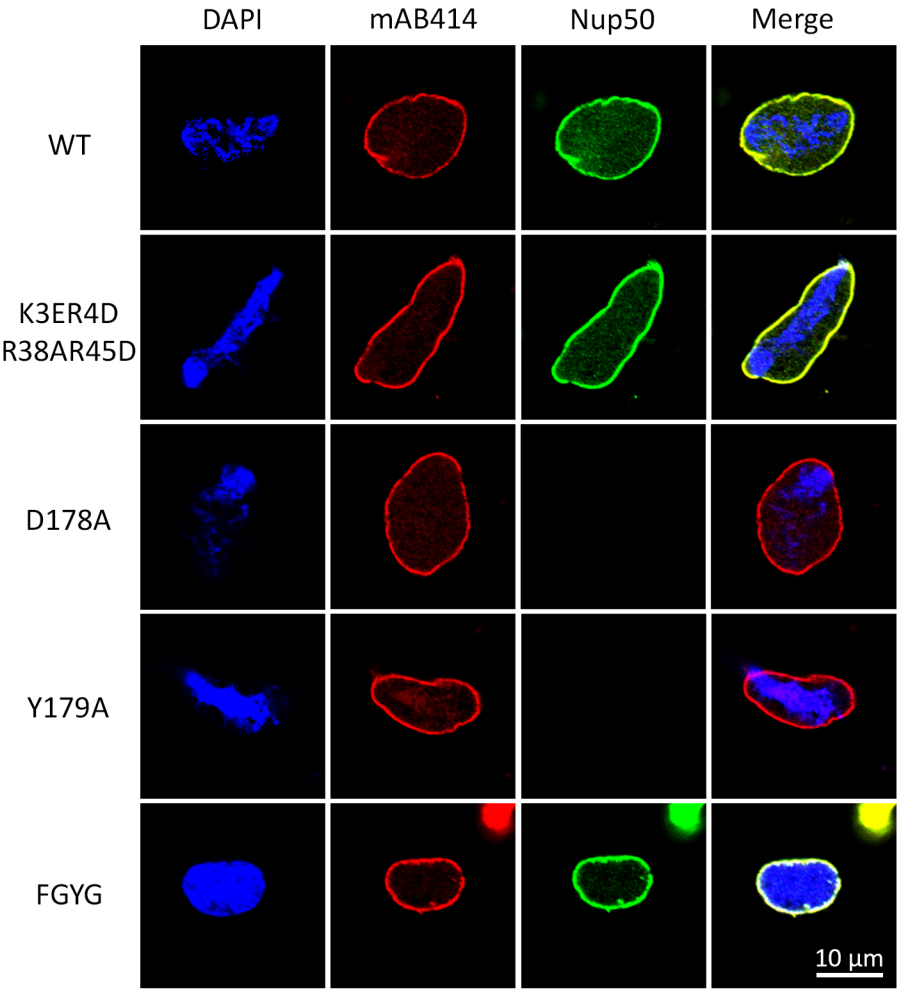

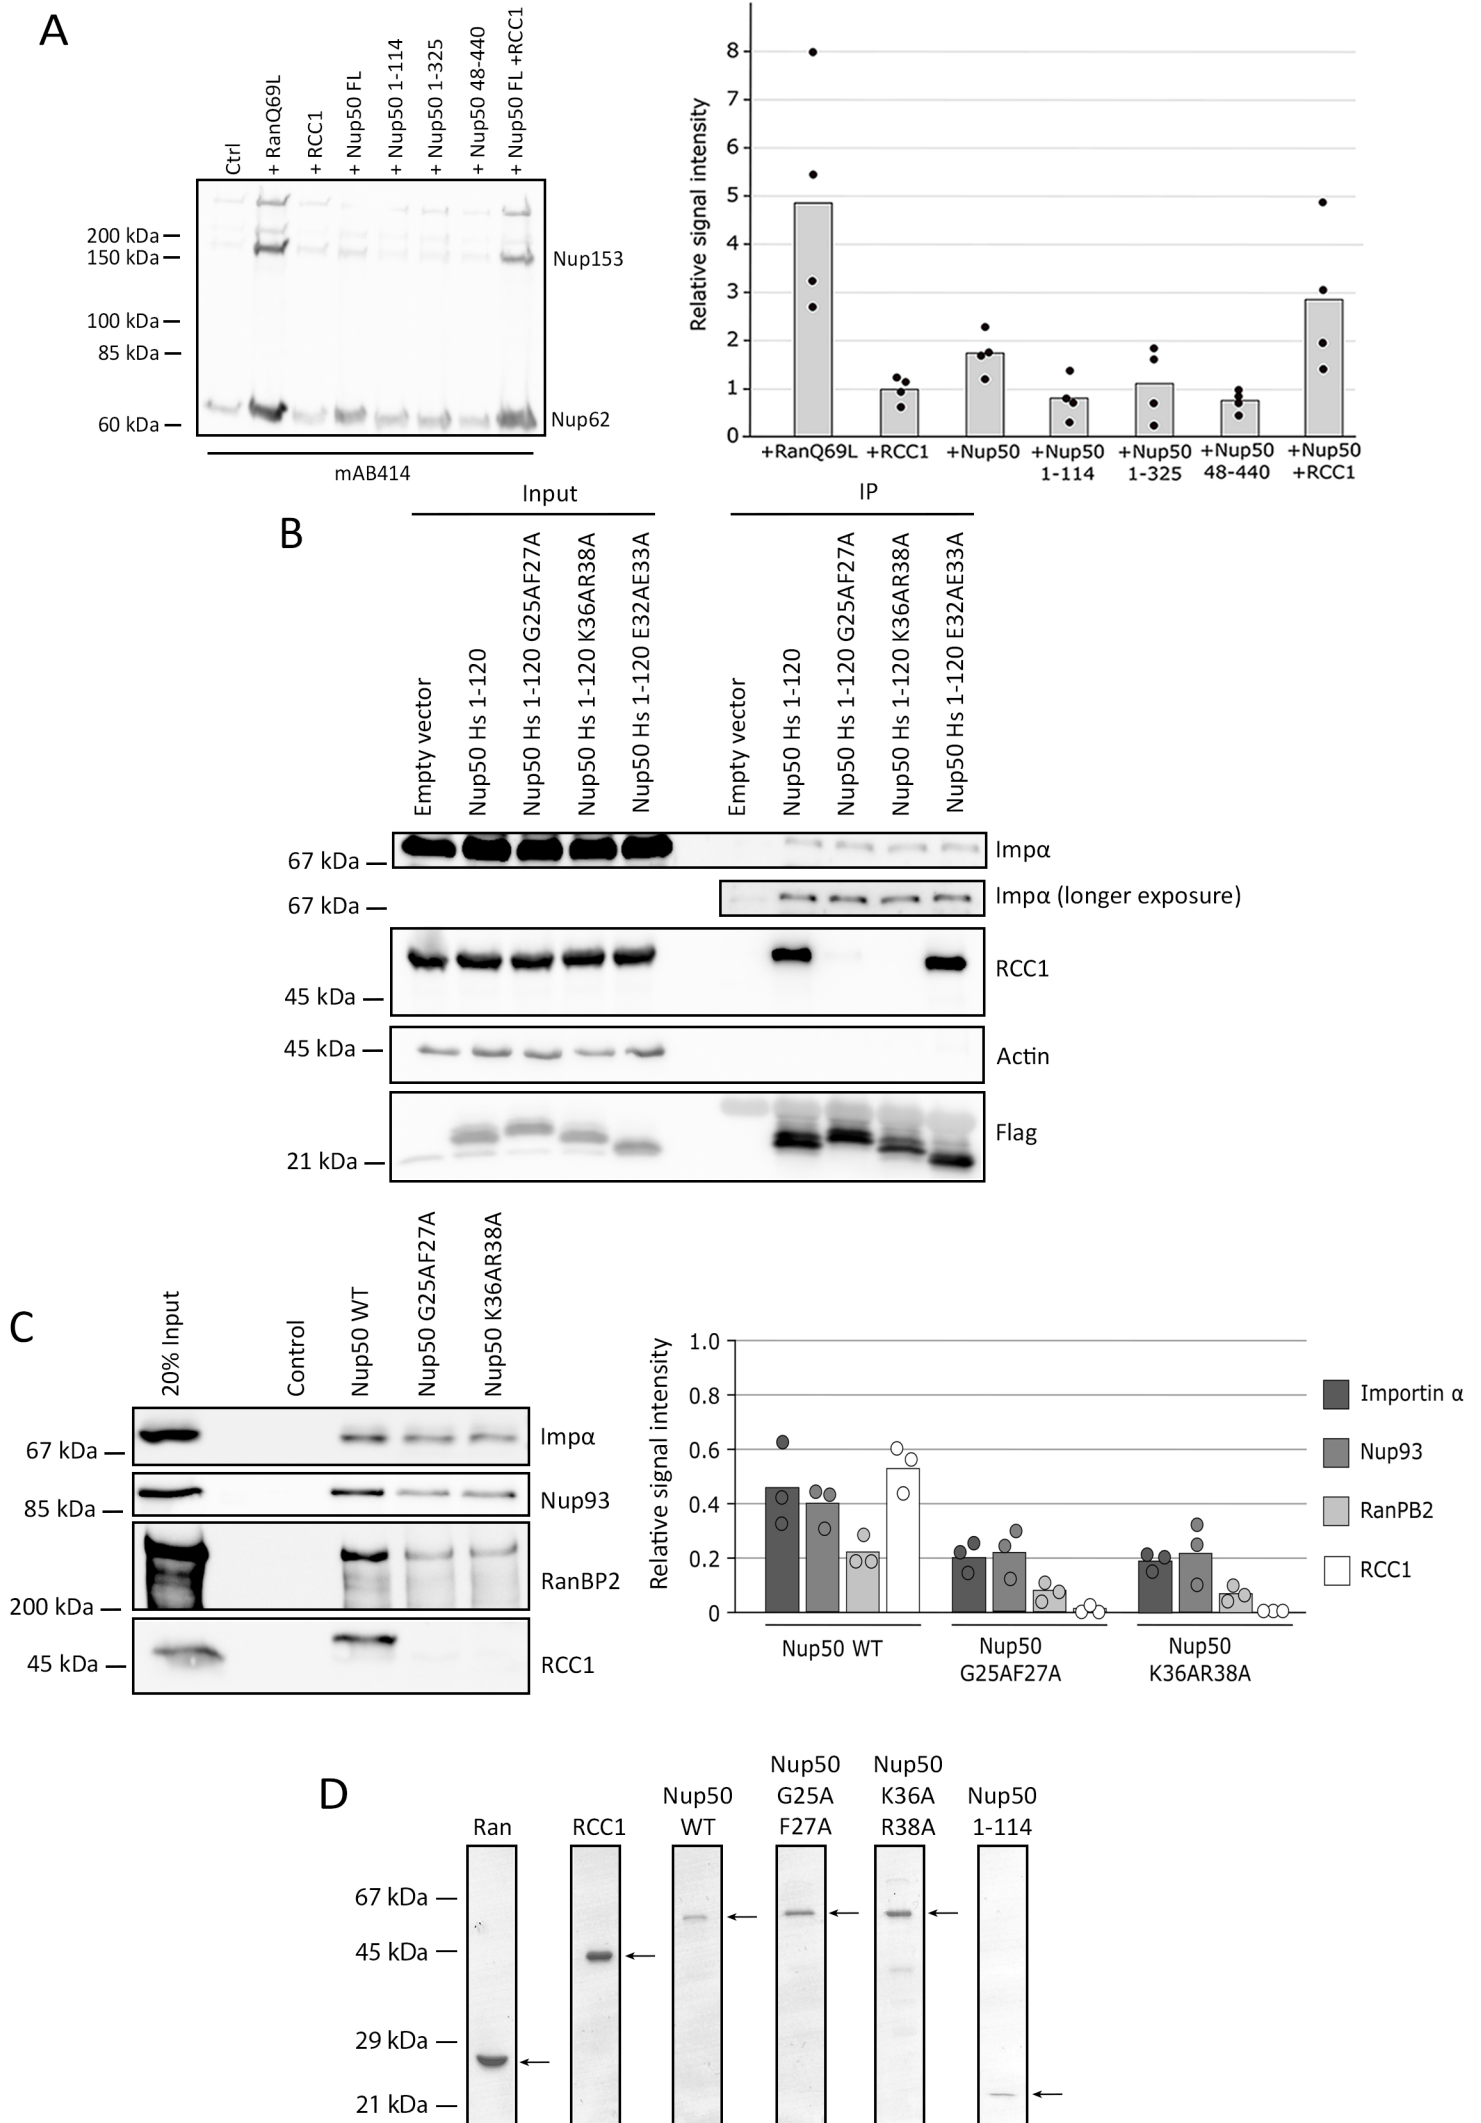

Supplement: EMBJ-40-e108788-s007.pdf [file EMBJ-40-e108788-s007.pdf]
